# Supplementary material for: Identification of Plasmid-Mediated Tigecycline-Resistant Gene tet(X4) in Enterobacter cloacae from Pigs in China
Source: PubMed Central journal article supplement (PMC9045145; doi:10.1128/spectrum.02064-21), 2022-03-01
Supplement: spectrum02064-21_supp_1_seq7.pdf [file spectrum02064-21_supp_1_seq7.pdf]

**TABLE S1** Antimicrobial susceptibility profiles of bacterial hosts carrying *tet(X4)*

| Strains                 | <i>E. cloacae</i><br>TECL_1                                             | <i>E. cloacae</i><br>TECL_2                                             | <i>E. coli</i><br>J53/pTECL_1-<br>290k-tetX4 | <i>E. coli</i><br>J53/pTECL_2-190k-<br>tetX4 | <i>E. coli</i><br>J53 |
|-------------------------|-------------------------------------------------------------------------|-------------------------------------------------------------------------|----------------------------------------------|----------------------------------------------|-----------------------|
| Description             |                                                                         |                                                                         |                                              |                                              |                       |
| Source                  | Pig farm                                                                | Pig farm                                                                | /                                            | /                                            | /                     |
| Collection date         | 2020                                                                    | 2020                                                                    | /                                            | /                                            | /                     |
|                         | Donor of <i>tet(X4)</i> -<br>carrying plasmid<br>pTECL_1-190k-<br>tetX4 | Donor of <i>tet(X4)</i> -<br>carrying plasmid<br>pTECL_2-290k-<br>tetX4 | Transconjugant                               | Transconjugant                               | Recipient             |
| MICs(mg/L) <sup>a</sup> |                                                                         |                                                                         |                                              |                                              |                       |
| TET                     | 256                                                                     | 256                                                                     | 128                                          | 128                                          | ≤1                    |
| TGC                     | 32                                                                      | 16                                                                      | 32                                           | 32                                           | 0.25                  |
| RD                      | 16                                                                      | > 128                                                                   | 8                                            | 16                                           | /                     |
| AMP                     | > 256                                                                   | > 256                                                                   | 8                                            | 8                                            | /                     |
| CHL                     | > 128                                                                   | > 128                                                                   | 128                                          | 128                                          | 8                     |
| CIP                     | 4                                                                       | 4                                                                       | ≤0.03                                        | ≤0.03                                        | ≤0.03                 |
| IMP                     | ≤0.25                                                                   | ≤0.25                                                                   | 0.5                                          | 0.5                                          | 0.5                   |
| CAZ                     | 2                                                                       | 32                                                                      | ≤1                                           | ≤1                                           | ≤1                    |
| GEN                     | ≤1                                                                      | 256                                                                     | ≤1                                           | ≤1                                           | ≤1                    |
| AMK                     | ≤1                                                                      | 2                                                                       | 2                                            | 2                                            | ≤1                    |
| CTX                     | ≤1                                                                      | 256                                                                     | ≤1                                           | ≤1                                           | ≤1                    |
| FOS                     | 256                                                                     | ≤16                                                                     | ≤16                                          | ≤16                                          | /                     |
| CT                      | 0.25                                                                    | > 16                                                                    | 0.25                                         | 0.25                                         | ≤0.125                |
| SXT                     | ≤0.25                                                                   | > 64                                                                    | ≤0.25                                        | ≤0.25                                        | ≤0.25                 |

a. TET, tetracycline; TGC, tigecycline; RD, rifamycin; AMP, ampicillin; CHL, chloramphenicol; CIP, ciprofloxacin; IMP, imipenem; CAZ, ceftazidime; GEN, gentamicin; AMK, amikacin; CTX, cefotaxime; FOS, fosfomycin; CT, colistin sulphate; SXT, trimethoprim-sulfamethoxazole

**TABLE S2** The primers for pTECL\_2-190k-tetX4

| Plasmid            | Primer     | Sequence (5' to 3')  | Amplified product size (bp) | Position (bp) |
|--------------------|------------|----------------------|-----------------------------|---------------|
| pTECL_2-190k-tetX4 | pTECL2-1-F | CGCCTTGCTGGTTGATGAAG | 802                         | 55191-56000   |
|                    | pTECL2-1-R | TGGAAGCGGGTTAGGTTGAC |                             |               |
|                    | pTECL2-2-F | GTGACGGGATTGGCAAGGTA | 841                         | 60459-61329   |
|                    | pTECL2-2-R | ACATGGGCATCGACATAGCC |                             |               |
|                    | pTECL2-3-F | CTGCTATTTGAGCGCCATGC | 582                         | 63632-64215   |
|                    | pTECL2-3-R | GTATCGAAGCGCTGAACGTC |                             |               |

**TABLE S3** The antibiotic resistance gene of plasmids carrying *tet(X4)*

| Plasmid            | GenBank accession number | Antibiotic resistance gene    |               |                |                                 |              |                            |              |
|--------------------|--------------------------|-------------------------------|---------------|----------------|---------------------------------|--------------|----------------------------|--------------|
|                    |                          | Tetracyclines-resistance gene |               |                | Chloramphenicol-resistance gene |              | Quinolones-resistance gene |              |
|                    |                          | <i>tet(A)</i>                 | <i>tet(M)</i> | <i>tet(X4)</i> | <i>floR</i>                     | <i>cmlA1</i> | <i>qnrS1</i>               | <i>qnrS2</i> |
| pTECL_2-190k-tetX4 | MZ773210.1               | 0                             | 0             | 1              | 1                               | 0            | 1                          | 0            |
| pLHM10-1           | CP037909.1               | 0                             | 0             | 1              | 0                               | 0            | 0                          | 0            |
| pYSP8-1            | CP037911.1               | 0                             | 0             | 1              | 1                               | 0            | 1                          | 0            |
| pG3X16-2-3         | CP038140.1               | 1                             | 1             | 1              | 1                               | 1            | 0                          | 0            |
| pYY76-1-2          | CP040929.1               | 1                             | 0             | 1              | 1                               | 0            | 0                          | 0            |
| p54-tetX           | CP041286.1               | 1                             | 1             | 1              | 1                               | 0            | 1                          | 0            |
| pYPE12-101k-tetX4  | CP041443.1               | 1                             | 1             | 1              | 1                               | 0            | 1                          | 0            |
| pYPE10-190k-tetX4  | CP041449.1               | 0                             | 0             | 1              | 1                               | 0            | 1                          | 0            |
| pYPE3-92k-tetX4    | CP041453.1               | 0                             | 0             | 1              | 1                               | 0            | 0                          | 0            |
| pNT1F31-tetX4      | CP045188.1               | 1                             | 1             | 1              | 1                               | 0            | 1                          | 0            |
| p1916D18-1         | CP045998.1               | 1                             | 0             | 1              | 1                               | 0            | 0                          | 0            |
| p1916D6-2          | CP046002.1               | 1                             | 0             | 1              | 1                               | 0            | 0                          | 0            |
| p1919D3-1          | CP046004.1               | 1                             | 0             | 1              | 1                               | 1            | 0                          | 0            |
| p1919D62-1         | CP046007.1               | 0                             | 0             | 1              | 1                               | 0            | 1                          | 0            |
| pT16R-1            | CP046717.1               | 0                             | 0             | 1              | 1                               | 0            | 1                          | 0            |
| pZF31-tetX-119kb   | CP047460.1               | 1                             | 1             | 1              | 1                               | 1            | 1                          | 0            |
| pZF34-tetX-114kb   | CP047466.1               | 0                             | 1             | 1              | 1                               | 1            | 1                          | 0            |
| p2EC1-1            | CP047572.1               | 0                             | 0             | 1              | 1                               | 0            | 0                          | 0            |
| p94EC-2            | CP047578.1               | 0                             | 0             | 1              | 1                               | 0            | 0                          | 0            |
| pEC931_tetX        | CP049121.1               | 1                             | 0             | 1              | 1                               | 0            | 0                          | 0            |
| pT28R-1            | CP049354.1               | 0                             | 0             | 1              | 1                               | 0            | 1                          | 0            |
| pCD58-3-1          | CP050037.1               | 1                             | 0             | 1              | 1                               | 0            | 1                          | 0            |
| pCD63-2-1          | CP050041.1               | 0                             | 0             | 1              | 1                               | 0            | 1                          | 0            |
| pCD74-2-2          | CP050046.1               | 1                             | 0             | 1              | 1                               | 0            | 1                          | 0            |
| pSTB20-1T          | CP050174.1               | 1                             | 1             | 1              | 1                               | 0            | 1                          | 0            |
| pHNCF11W-tetX4     | CP053047.1               | 1                             | 0             | 1              | 1                               | 0            | 0                          | 0            |
| pSY3626C1_315k     | CP059044.1               | 0                             | 1             | 1              | 1                               | 0            | 1                          | 0            |
| pSY3626_190k_tetX  | CP059284.1               | 0                             | 0             | 1              | 1                               | 0            | 1                          | 0            |
| pSal21GXH-tetX4    | CP060586.1               | 1                             | 1             | 1              | 1                               | 1            | 1                          | 0            |
| pPK5074-tetX       | CP072807.1               | 0                             | 0             | 1              | 1                               | 0            | 0                          | 0            |
| pNT1F10-tetX4      | CP075463.1               | 1                             | 1             | 1              | 1                               | 0            | 1                          | 0            |
| pNT1N34-tetX4      | CP075467.1               | 1                             | 1             | 1              | 1                               | 0            | 1                          | 0            |
| pNT1W22-tetX4      | CP075470.1               | 1                             | 1             | 1              | 1                               | 0            | 1                          | 0            |
| pNT1F25-tetX4      | CP075471.1               | 1                             | 1             | 1              | 1                               | 0            | 1                          | 0            |
| pNT1N28-tetX4      | CP075473.1               | 1                             | 1             | 1              | 1                               | 0            | 1                          | 0            |
| pNT1W25-tetX4      | CP075479.1               | 1                             | 1             | 1              | 1                               | 0            | 1                          | 0            |
| pNT1N31-tetX4      | CP075481.1               | 1                             | 1             | 1              | 1                               | 0            | 1                          | 0            |
| pNT1N25-tetX4      | CP075485.1               | 1                             | 1             | 1              | 1                               | 0            | 1                          | 0            |
| pNT1F34-tetX4      | CP075486.1               | 1                             | 1             | 1              | 1                               | 0            | 1                          | 0            |

|                    |            |   |   |   |   |   |   |   |
|--------------------|------------|---|---|---|---|---|---|---|
| pNTT31XS-tetX4     | CP077430.1 | 0 | 0 | 1 | 0 | 0 | 0 | 0 |
| pPK8217-tetX       | CP080124.1 | 0 | 0 | 1 | 1 | 0 | 0 | 0 |
| pPK8568-tetX       | CP080129.1 | 0 | 0 | 1 | 1 | 0 | 0 | 0 |
| pPK8277-tetX       | CP080134.1 | 0 | 0 | 1 | 1 | 0 | 0 | 0 |
| pPK8241-tetX       | CP080140.1 | 0 | 0 | 1 | 0 | 0 | 0 | 0 |
| pPK8276-tetX       | CP080147.1 | 0 | 0 | 1 | 1 | 0 | 0 | 0 |
| pPK8261-tetX       | CP080156.1 | 0 | 0 | 1 | 1 | 0 | 0 | 0 |
| pPK8275-tetX       | CP080164.1 | 0 | 0 | 1 | 1 | 0 | 0 | 0 |
| pPK8566-tetX       | CP080175.1 | 0 | 0 | 1 | 1 | 0 | 0 | 0 |
| pPK5086-tetX       | CP080371.1 | 0 | 0 | 1 | 1 | 0 | 0 | 0 |
| pNUITM-VK5_mdr     | LC633285.1 | 0 | 0 | 1 | 1 | 0 | 1 | 0 |
| p47EC              | MK134376.1 | 1 | 1 | 1 | 1 | 0 | 1 | 0 |
| p2019XSD11-190     | MN101856.1 | 0 | 0 | 1 | 1 | 0 | 1 | 0 |
| p16EC-9K           | MN381965.1 | 0 | 0 | 1 | 0 | 0 | 0 | 0 |
| pEC05-X4           | MN436006.1 | 1 | 0 | 1 | 1 | 0 | 0 | 0 |
| pEC12-X4           | MN436007.1 | 1 | 0 | 1 | 1 | 0 | 0 | 0 |
| pRB3-1_31K_tetX    | MT197111.1 | 1 | 0 | 1 | 1 | 0 | 0 | 0 |
| pRF173-1_87k_tetX  | MT219816.1 | 0 | 0 | 1 | 0 | 0 | 0 | 0 |
| pRF148-2_101k_tetX | MT219817.1 | 1 | 1 | 1 | 1 | 0 | 1 | 0 |
| pRF148-1_119k_tetX | MT219818.1 | 1 | 1 | 1 | 1 | 1 | 0 | 0 |
| pRF52-1_119k_tetX  | MT219819.1 | 1 | 1 | 1 | 1 | 1 | 0 | 0 |
| pRF108-2_97k_tetX  | MT219820.1 | 1 | 1 | 1 | 1 | 0 | 1 | 0 |
| pRF45-1_31k_tetX   | MT219821.1 | 1 | 0 | 1 | 1 | 0 | 0 | 0 |
| pRF14-1_50k_tetX   | MT219822.1 | 0 | 0 | 1 | 0 | 0 | 1 | 0 |
| pRF10-1_119k_tetX  | MT219823.1 | 1 | 1 | 1 | 0 | 1 | 0 | 0 |
| pRT18-1_294k_tetX  | MT219824.1 | 0 | 0 | 1 | 1 | 0 | 1 | 0 |
| pRW7-1_235k_tetX   | MT219825.1 | 0 | 0 | 1 | 1 | 0 | 1 | 1 |
| pRW8-1_122k_tetX   | MT219826.1 | 1 | 1 | 1 | 1 | 1 | 0 | 0 |
| p2GS3-tetX4        | MW940614.1 | 0 | 0 | 1 | 0 | 0 | 1 | 0 |
| pAB4-4-tetX4       | MW940615.1 | 0 | 0 | 1 | 1 | 0 | 1 | 0 |
| pHN10R-tetX4       | MW940616.1 | 1 | 0 | 1 | 1 | 0 | 0 | 0 |
| pHS2-1-tetX4       | MW940617.1 | 0 | 0 | 1 | 0 | 0 | 0 | 0 |
| pHS10-1-tetX4      | MW940618.1 | 1 | 0 | 1 | 1 | 0 | 0 | 0 |
| pHS19-2-tetX4      | MW940619.1 | 1 | 0 | 1 | 1 | 0 | 0 | 0 |
| pSC4R-tetX4        | MW940620.1 | 0 | 0 | 1 | 1 | 0 | 0 | 1 |
| pSDP9R-tetX4       | MW940621.1 | 0 | 0 | 1 | 0 | 0 | 0 | 0 |
| pSH9W-tetX4        | MW940622.1 | 1 | 0 | 1 | 1 | 0 | 0 | 0 |
| pSH12R-tetX4       | MW940623.1 | 0 | 0 | 1 | 0 | 0 | 0 | 0 |
| pSX5G-tetX4        | MW940624.1 | 1 | 0 | 1 | 1 | 0 | 0 | 0 |
| pSX8G-tetX4        | MW940625.1 | 0 | 0 | 1 | 1 | 0 | 1 | 0 |
| pSZ5R-tetX4        | MW940626.1 | 1 | 0 | 1 | 1 | 0 | 0 | 0 |
| pSZ6R-tetX4        | MW940627.1 | 0 | 0 | 1 | 1 | 0 | 1 | 0 |
| pSZ10R-tetX4       | MW940628.1 | 1 | 1 | 1 | 1 | 1 | 0 | 0 |
| pSZ11R-tetX4       | MW940629.1 | 1 | 0 | 1 | 1 | 0 | 0 | 0 |



|                    |   |   |   |   |   |   |   |   |   |   |
|--------------------|---|---|---|---|---|---|---|---|---|---|
| pNT1W22-tetX4      | 0 | 0 | 0 | 0 | 0 | 0 | 0 | 0 | 1 | 0 |
| pNT1F25-tetX4      | 0 | 0 | 0 | 0 | 0 | 0 | 0 | 0 | 1 | 0 |
| pNT1N28-tetX4      | 0 | 0 | 0 | 0 | 0 | 0 | 0 | 0 | 1 | 0 |
| pNT1W25-tetX4      | 0 | 0 | 0 | 0 | 0 | 0 | 0 | 1 | 0 | 0 |
| pNT1N31-tetX4      | 0 | 0 | 0 | 0 | 0 | 0 | 0 | 0 | 1 | 0 |
| pNT1N25-tetX4      | 0 | 0 | 0 | 0 | 0 | 0 | 0 | 0 | 1 | 0 |
| pNT1F34-tetX4      | 0 | 0 | 0 | 0 | 0 | 0 | 0 | 0 | 1 | 0 |
| pNTT31XS-tetX4     | 0 | 0 | 0 | 0 | 0 | 0 | 0 | 0 | 0 | 0 |
| pPK8217-tetX       | 0 | 0 | 0 | 0 | 0 | 0 | 0 | 0 | 0 | 1 |
| pPK8568-tetX       | 0 | 0 | 0 | 0 | 0 | 1 | 0 | 0 | 0 | 0 |
| pPK8277-tetX       | 0 | 0 | 0 | 0 | 0 | 0 | 0 | 0 | 0 | 1 |
| pPK8241-tetX       | 0 | 0 | 0 | 0 | 0 | 0 | 0 | 0 | 0 | 0 |
| pPK8276-tetX       | 0 | 0 | 0 | 0 | 0 | 0 | 0 | 0 | 0 | 0 |
| pPK8261-tetX       | 0 | 0 | 0 | 0 | 0 | 0 | 0 | 0 | 0 | 1 |
| pPK8275-tetX       | 0 | 0 | 0 | 0 | 0 | 0 | 0 | 0 | 0 | 1 |
| pPK8566-tetX       | 0 | 0 | 0 | 0 | 0 | 0 | 0 | 0 | 0 | 1 |
| pPK5086-tetX       | 0 | 0 | 0 | 0 | 0 | 0 | 0 | 0 | 0 | 1 |
| pNUITM-VK5_mdr     | 1 | 0 | 1 | 1 | 0 | 0 | 0 | 0 | 0 | 0 |
| p47EC              | 0 | 0 | 0 | 0 | 0 | 0 | 0 | 0 | 1 | 0 |
| p2019XSD11-190     | 0 | 0 | 0 | 0 | 0 | 0 | 0 | 0 | 1 | 0 |
| p16EC-9K           | 0 | 0 | 0 | 0 | 0 | 0 | 0 | 0 | 0 | 0 |
| pEC05-X4           | 0 | 0 | 0 | 0 | 0 | 0 | 0 | 0 | 0 | 0 |
| pEC12-X4           | 0 | 0 | 0 | 0 | 0 | 0 | 0 | 0 | 0 | 0 |
| pRB3-1_31k_tetX    | 0 | 0 | 0 | 0 | 0 | 0 | 0 | 0 | 0 | 0 |
| pRF173-1_87k_tetX  | 0 | 0 | 0 | 0 | 0 | 0 | 0 | 0 | 0 | 0 |
| pRF148-2_101k_tetX | 0 | 0 | 0 | 0 | 0 | 0 | 0 | 0 | 1 | 0 |
| pRF148-1_119k_tetX | 0 | 0 | 0 | 0 | 0 | 0 | 0 | 0 | 1 | 0 |
| pRF52-1_119k_tetX  | 0 | 0 | 0 | 0 | 0 | 0 | 0 | 0 | 0 | 0 |
| pRF108-2_97k_tetX  | 0 | 0 | 0 | 0 | 0 | 0 | 0 | 0 | 1 | 0 |
| pRF45-1_31k_tetX   | 0 | 0 | 0 | 0 | 0 | 0 | 0 | 0 | 0 | 0 |
| pRF14-1_50k_tetX   | 0 | 0 | 0 | 0 | 0 | 0 | 1 | 0 | 0 | 0 |
| pRF10-1_119k_tetX  | 0 | 0 | 0 | 0 | 0 | 0 | 0 | 0 | 0 | 0 |
| pRT18-1_294k_tetX  | 0 | 0 | 0 | 0 | 0 | 0 | 0 | 0 | 1 | 0 |
| pRW7-1_235k_tetX   | 0 | 0 | 0 | 0 | 0 | 0 | 0 | 0 | 1 | 0 |
| pRW8-1_122k_tetX   | 0 | 0 | 0 | 0 | 0 | 0 | 0 | 0 | 1 | 0 |
| p2GS3-tetX4        | 0 | 0 | 0 | 0 | 0 | 0 | 0 | 0 | 0 | 0 |
| pAB4-4-tetX4       | 0 | 0 | 0 | 0 | 0 | 0 | 0 | 0 | 1 | 0 |
| pHN10R-tetX4       | 0 | 0 | 0 | 0 | 1 | 0 | 0 | 0 | 0 | 0 |



|                   |   |   |   |   |   |   |   |   |   |   |
|-------------------|---|---|---|---|---|---|---|---|---|---|
| p94EC-2           | 0 | 1 | 0 | 0 | 0 | 0 | 0 | 0 | 1 | 0 |
| pEC931_tetX       | 0 | 0 | 0 | 1 | 0 | 0 | 0 | 0 | 0 | 0 |
| pT28R-1           | 0 | 0 | 0 | 0 | 1 | 0 | 0 | 0 | 0 | 0 |
| pCD58-3-1         | 0 | 0 | 0 | 0 | 0 | 0 | 0 | 0 | 0 | 1 |
| pCD63-2-1         | 0 | 0 | 0 | 1 | 0 | 0 | 0 | 0 | 0 | 0 |
| pCD74-2-2         | 0 | 0 | 0 | 0 | 0 | 0 | 0 | 0 | 0 | 1 |
| pSTB20-1T         | 0 | 0 | 0 | 0 | 0 | 0 | 0 | 0 | 0 | 0 |
| pHNCF11W-tetX4    | 0 | 0 | 0 | 1 | 0 | 0 | 0 | 0 | 0 | 0 |
| pSY3626C1_315k    | 1 | 0 | 0 | 0 | 1 | 1 | 0 | 0 | 0 | 0 |
| pSY3626_190k_tetX | 0 | 0 | 0 | 0 | 1 | 0 | 0 | 0 | 0 | 0 |
| pSal21GXH-tetX4   | 0 | 0 | 0 | 1 | 1 | 0 | 0 | 0 | 0 | 0 |
| pPK5074-tetX      | 0 | 0 | 0 | 0 | 1 | 1 | 0 | 1 | 0 | 1 |
| pNT1F10-tetX4     | 0 | 0 | 0 | 0 | 0 | 0 | 0 | 0 | 0 | 0 |
| pNT1N34-tetX4     | 0 | 0 | 0 | 0 | 0 | 0 | 0 | 0 | 0 | 0 |
| pNT1W22-tetX4     | 0 | 0 | 0 | 0 | 0 | 0 | 0 | 0 | 0 | 0 |
| pNT1F25-tetX4     | 0 | 0 | 0 | 0 | 0 | 0 | 0 | 0 | 0 | 0 |
| pNT1N28-tetX4     | 0 | 0 | 0 | 0 | 0 | 0 | 0 | 0 | 0 | 0 |
| pNT1W25-tetX4     | 0 | 0 | 0 | 0 | 0 | 0 | 0 | 0 | 0 | 0 |
| pNT1N31-tetX4     | 0 | 0 | 0 | 0 | 0 | 0 | 0 | 0 | 0 | 0 |
| pNT1N25-tetX4     | 0 | 0 | 0 | 0 | 0 | 0 | 0 | 0 | 0 | 0 |
| pNT1F34-tetX4     | 0 | 0 | 0 | 0 | 0 | 0 | 0 | 0 | 0 | 0 |
| pNTT31XS-tetX4    | 0 | 0 | 0 | 0 | 0 | 0 | 0 | 0 | 0 | 0 |
| pPK8217-tetX      | 0 | 0 | 0 | 0 | 1 | 1 | 0 | 1 | 0 | 1 |
| pPK8568-tetX      | 0 | 0 | 0 | 0 | 0 | 0 | 0 | 0 | 0 | 0 |
| pPK8277-tetX      | 0 | 0 | 0 | 0 | 0 | 0 | 0 | 0 | 0 | 0 |
| pPK8241-tetX      | 0 | 0 | 0 | 0 | 0 | 0 | 0 | 0 | 0 | 0 |
| pPK8276-tetX      | 0 | 0 | 0 | 0 | 0 | 0 | 0 | 0 | 0 | 0 |
| pPK8261-tetX      | 0 | 0 | 0 | 0 | 0 | 0 | 0 | 0 | 0 | 0 |
| pPK8275-tetX      | 0 | 0 | 0 | 0 | 0 | 0 | 0 | 0 | 0 | 0 |
| pPK8566-tetX      | 0 | 0 | 0 | 0 | 0 | 0 | 0 | 0 | 0 | 0 |
| pPK5086-tetX      | 0 | 0 | 0 | 0 | 0 | 0 | 0 | 0 | 0 | 0 |
| pNUITM-VK5_mdr    | 1 | 0 | 1 | 0 | 1 | 0 | 0 | 1 | 0 | 1 |
| p47EC             | 0 | 0 | 0 | 1 | 0 | 1 | 0 | 0 | 0 | 0 |
| p2019XSD11-190    | 0 | 0 | 0 | 0 | 1 | 0 | 0 | 0 | 0 | 0 |
| p16EC-9K          | 0 | 0 | 0 | 0 | 0 | 0 | 0 | 0 | 0 | 0 |
| pEC05-X4          | 0 | 0 | 0 | 1 | 0 | 0 | 0 | 0 | 0 | 0 |
| pEC12-X4          | 0 | 0 | 0 | 1 | 0 | 0 | 0 | 0 | 0 | 0 |
| pRB3-1_31K_tetX   | 0 | 0 | 0 | 1 | 0 | 0 | 0 | 0 | 0 | 0 |







|                    |   |   |   |   |   |   |   |   |
|--------------------|---|---|---|---|---|---|---|---|
| pPK8276-tetX       | 0 | 0 | 0 | 0 | 0 | 0 | 0 | 0 |
| pPK8261-tetX       | 0 | 1 | 0 | 0 | 0 | 0 | 0 | 0 |
| pPK8275-tetX       | 0 | 1 | 0 | 0 | 0 | 0 | 0 | 0 |
| pPK8566-tetX       | 0 | 1 | 0 | 0 | 0 | 0 | 0 | 0 |
| pPK5086-tetX       | 0 | 1 | 0 | 0 | 0 | 0 | 0 | 0 |
| pNUITM-VK5_mdr     | 0 | 0 | 0 | 1 | 1 | 0 | 0 | 0 |
| p47EC              | 0 | 0 | 0 | 0 | 0 | 1 | 1 | 0 |
| p2019XSD11-190     | 0 | 0 | 0 | 0 | 0 | 0 | 0 | 1 |
| p16EC-9K           | 0 | 0 | 0 | 0 | 0 | 0 | 0 | 0 |
| pEC05-X4           | 0 | 0 | 0 | 0 | 0 | 0 | 1 | 0 |
| pEC12-X4           | 0 | 0 | 0 | 0 | 0 | 0 | 1 | 0 |
| pRB3-1_31K_tetX    | 0 | 0 | 0 | 0 | 0 | 0 | 1 | 0 |
| pRF173-1_87k_tetX  | 0 | 0 | 0 | 0 | 0 | 0 | 0 | 0 |
| pRF148-2_101k_tetX | 1 | 0 | 0 | 0 | 0 | 1 | 0 | 0 |
| pRF148-1_119k_tetX | 0 | 1 | 0 | 0 | 0 | 1 | 0 | 0 |
| pRF52-1_119k_tetX  | 0 | 1 | 0 | 0 | 0 | 1 | 0 | 0 |
| pRF108-2_97k_tetX  | 1 | 0 | 0 | 0 | 0 | 1 | 0 | 0 |
| pRF45-1_31k_tetX   | 0 | 0 | 0 | 0 | 0 | 0 | 1 | 0 |
| pRF14-1_50k_tetX   | 0 | 0 | 0 | 0 | 0 | 0 | 0 | 0 |
| pRF10-1_119k_tetX  | 0 | 1 | 0 | 0 | 0 | 1 | 0 | 0 |
| pRT18-1_294k_tetX  | 0 | 0 | 0 | 0 | 0 | 0 | 0 | 1 |
| pRW7-1_235k_tetX   | 0 | 0 | 0 | 0 | 0 | 0 | 0 | 1 |
| pRW8-1_122k_tetX   | 0 | 1 | 0 | 0 | 0 | 1 | 0 | 0 |
| p2GS3-tetX4        | 0 | 0 | 0 | 0 | 1 | 0 | 0 | 0 |
| pAB4-4-tetX4       | 0 | 0 | 0 | 0 | 0 | 0 | 0 | 1 |
| pHN10R-tetX4       | 0 | 0 | 0 | 0 | 0 | 0 | 1 | 0 |
| pHS2-1-tetX4       | 0 | 0 | 0 | 0 | 0 | 0 | 0 | 0 |
| pHS10-1-tetX4      | 0 | 0 | 0 | 0 | 0 | 0 | 1 | 0 |
| pHS19-2-tetX4      | 0 | 0 | 0 | 0 | 0 | 0 | 1 | 0 |
| pSC4R-tetX4        | 0 | 0 | 0 | 0 | 0 | 0 | 0 | 0 |
| pSDP9R-tetX4       | 0 | 0 | 0 | 0 | 0 | 0 | 0 | 0 |
| pSH9W-tetX4        | 0 | 0 | 0 | 0 | 0 | 0 | 1 | 0 |
| pSH12R-tetX4       | 0 | 0 | 0 | 0 | 0 | 0 | 0 | 0 |
| pSX5G-tetX4        | 0 | 0 | 0 | 0 | 0 | 0 | 1 | 0 |
| pSX8G-tetX4        | 0 | 0 | 0 | 0 | 0 | 0 | 0 | 1 |
| pSZ5R-tetX4        | 0 | 0 | 0 | 0 | 0 | 0 | 1 | 0 |
| pSZ6R-tetX4        | 0 | 0 | 0 | 0 | 0 | 0 | 0 | 1 |
| pSZ10R-tetX4       | 0 | 1 | 0 | 0 | 0 | 1 | 0 | 0 |
| pSZ11R-tetX4       | 0 | 0 | 0 | 0 | 0 | 0 | 1 | 0 |

|               |   |   |   |   |   |   |   |   |
|---------------|---|---|---|---|---|---|---|---|
| pAB12-1-tetX4 | 0 | 0 | 0 | 0 | 1 | 0 | 0 | 0 |
| pHN13R-tetX4  | 0 | 0 | 0 | 0 | 1 | 0 | 0 | 0 |

| Plasmid            | Antibiotic resistance gene |               |               |                            |              |
|--------------------|----------------------------|---------------|---------------|----------------------------|--------------|
|                    | Macrolides-resistance gene |               |               | Fosfomycin-resistance gene |              |
|                    | <i>erm(42)</i>             | <i>erm(B)</i> | <i>mph(A)</i> | <i>mef(B)</i>              | <i>fosA3</i> |
| pTECL_2-190k-tetX4 | 0                          | 0             | 0             | 0                          | 0            |
| pLHM10-1           | 0                          | 0             | 0             | 0                          | 0            |
| pYSP8-1            | 0                          | 1             | 0             | 0                          | 0            |
| pG3X16-2-3         | 1                          | 0             | 0             | 0                          | 0            |
| pYY76-1-2          | 0                          | 0             | 0             | 0                          | 0            |
| p54-tetX           | 0                          | 0             | 0             | 1                          | 0            |
| pYPE12-101k-tetX4  | 0                          | 0             | 0             | 1                          | 0            |
| pYPE10-190k-tetX4  | 0                          | 0             | 0             | 0                          | 0            |
| pYPE3-92k-tetX4    | 0                          | 0             | 0             | 1                          | 0            |
| pNT1F31-tetX4      | 0                          | 0             | 0             | 1                          | 0            |
| p1916D18-1         | 0                          | 0             | 0             | 0                          | 0            |
| p1916D6-2          | 0                          | 0             | 0             | 0                          | 0            |
| p1919D3-1          | 0                          | 0             | 0             | 0                          | 0            |
| p1919D62-1         | 0                          | 0             | 0             | 0                          | 0            |
| pT16R-1            | 0                          | 0             | 0             | 0                          | 0            |
| pZF31-tetX-119kb   | 1                          | 0             | 0             | 0                          | 0            |
| pZF34-tetX-114kb   | 1                          | 0             | 0             | 0                          | 0            |
| p2EC1-1            | 0                          | 0             | 0             | 0                          | 0            |
| p94EC-2            | 0                          | 0             | 0             | 0                          | 1            |
| pEC931_tetX        | 0                          | 0             | 0             | 0                          | 0            |
| pT28R-1            | 0                          | 0             | 0             | 0                          | 0            |
| pCD58-3-1          | 0                          | 0             | 0             | 0                          | 0            |
| pCD63-2-1          | 0                          | 0             | 0             | 0                          | 0            |
| pCD74-2-2          | 0                          | 0             | 0             | 0                          | 0            |
| pSTB20-1T          | 0                          | 0             | 0             | 1                          | 0            |
| pHNCF11W-tetX4     | 0                          | 0             | 0             | 0                          | 0            |
| pSY3626C1_315k     | 0                          | 0             | 0             | 0                          | 0            |
| pSY3626_190k_tetX  | 0                          | 0             | 0             | 0                          | 0            |
| pSal21GXH-tetX4    | 0                          | 0             | 0             | 0                          | 0            |
| pPK5074-tetX       | 0                          | 0             | 0             | 0                          | 0            |
| pNT1F10-tetX4      | 0                          | 0             | 0             | 1                          | 0            |
| pNT1N34-tetX4      | 0                          | 0             | 0             | 1                          | 0            |
| pNT1W22-tetX4      | 0                          | 0             | 0             | 1                          | 0            |
| pNT1F25-tetX4      | 0                          | 0             | 0             | 1                          | 0            |
| pNT1N28-tetX4      | 0                          | 0             | 0             | 1                          | 0            |
| pNT1W25-tetX4      | 0                          | 0             | 0             | 1                          | 0            |
| pNT1N31-tetX4      | 0                          | 0             | 0             | 1                          | 0            |
| pNT1N25-tetX4      | 0                          | 0             | 0             | 1                          | 0            |

|                    |   |   |   |   |   |
|--------------------|---|---|---|---|---|
| pNT1F34-tetX4      | 0 | 0 | 0 | 1 | 0 |
| pNTT31XS-tetX4     | 0 | 0 | 0 | 0 | 0 |
| pPK8217-tetX       | 0 | 0 | 0 | 0 | 0 |
| pPK8568-tetX       | 0 | 0 | 0 | 0 | 0 |
| pPK8277-tetX       | 0 | 0 | 1 | 0 | 1 |
| pPK8241-tetX       | 0 | 0 | 0 | 0 | 0 |
| pPK8276-tetX       | 0 | 0 | 0 | 0 | 0 |
| pPK8261-tetX       | 0 | 0 | 1 | 0 | 1 |
| pPK8275-tetX       | 0 | 0 | 1 | 0 | 1 |
| pPK8566-tetX       | 0 | 0 | 1 | 0 | 1 |
| pPK5086-tetX       | 0 | 0 | 1 | 0 | 1 |
| pNUITM-VK5_mdr     | 0 | 0 | 0 | 0 | 0 |
| p47EC              | 1 | 0 | 0 | 0 | 0 |
| p2019XSD11-190     | 0 | 0 | 0 | 0 | 0 |
| p16EC-9K           | 0 | 0 | 0 | 0 | 0 |
| pEC05-X4           | 0 | 0 | 0 | 0 | 0 |
| pEC12-X4           | 0 | 0 | 0 | 0 | 0 |
| pRB3-1_31K_tetX    | 0 | 0 | 0 | 0 | 0 |
| pRF173-1_87k_tetX  | 1 | 0 | 0 | 0 | 0 |
| pRF148-2_101k_tetX | 0 | 0 | 0 | 1 | 0 |
| pRF148-1_119k_tetX | 0 | 0 | 1 | 0 | 0 |
| pRF52-1_119k_tetX  | 1 | 0 | 0 | 0 | 0 |
| pRF108-2_97k_tetX  | 0 | 0 | 0 | 1 | 0 |
| pRF45-1_31k_tetX   | 0 | 0 | 0 | 0 | 0 |
| pRF14-1_50k_tetX   | 0 | 0 | 0 | 0 | 0 |
| pRF10-1_119k_tetX  | 1 | 0 | 0 | 0 | 0 |
| pRT18-1_294k_tetX  | 0 | 0 | 0 | 0 | 0 |
| pRW7-1_235k_tetX   | 0 | 0 | 0 | 0 | 0 |
| pRW8-1_122k_tetX   | 0 | 0 | 1 | 0 | 0 |
| p2GS3-tetX4        | 0 | 0 | 0 | 0 | 0 |
| pAB4-4-tetX4       | 0 | 0 | 0 | 0 | 0 |
| pHN10R-tetX4       | 0 | 0 | 0 | 0 | 0 |
| pHS2-1-tetX4       | 0 | 0 | 0 | 0 | 0 |
| pHS10-1-tetX4      | 0 | 0 | 0 | 0 | 0 |
| pHS19-2-tetX4      | 0 | 0 | 0 | 0 | 0 |
| pSC4R-tetX4        | 0 | 0 | 0 | 0 | 0 |
| pSDP9R-tetX4       | 0 | 0 | 0 | 0 | 0 |
| pSH9W-tetX4        | 0 | 0 | 0 | 0 | 0 |
| pSH12R-tetX4       | 0 | 0 | 0 | 0 | 0 |
| pSX5G-tetX4        | 0 | 0 | 0 | 0 | 0 |
| pSX8G-tetX4        | 0 | 0 | 0 | 0 | 0 |
| pSZ5R-tetX4        | 0 | 0 | 0 | 0 | 0 |
| pSZ6R-tetX4        | 0 | 0 | 0 | 0 | 0 |
| pSZ10R-tetX4       | 1 | 0 | 1 | 0 | 0 |

|               |   |   |   |   |   |
|---------------|---|---|---|---|---|
| pSZ11R-tetX4  | 0 | 0 | 0 | 0 | 0 |
| pAB12-1-tetX4 | 1 | 0 | 0 | 0 | 0 |
| pHN13R-tetX4  | 1 | 0 | 0 | 0 | 0 |

---
